# Supplementary material for: Utilizing Novel Lignocellulosic Material from Hart’s-Tongue Fern (Asplenium scolopendrium) Leaves for Crystal Violet Adsorption: Characterization, Application, and Optimization
Source: MDPI journal article supplement (doi:10.3390/polym15193923), 2023-09-28
Supplement: s1 [file s1]

# Utilizing Novel Lignocellulosic Material from Hart's-Tongue Fern (*Asplenium scolopendrium*) Leaves for Crystal Violet Adsorption: Characterization, Application, and Optimization

Giannin Mosoarca, Cosmin Vancea, Simona Popa, Mircea Dan \* and Sorina Boran \*

Faculty of Industrial Chemistry and Environmental Engineering, Politehnica University Timisoara, Bd. V. Parvan, No. 6, 300223 Timisoara, Romania; giannin.mosoarca@upt.ro (G.M.); cosmin.vancea@upt.ro (C.V.); simona.popa@upt.ro (S.P.)

\* Correspondence: mircea.dan@upt.ro (M.D.); sorina.boran@upt.ro (S.B.);  
Tel.: +40-256404176 (M.D.); +40-256-404-228 (S.B.)

**Table S1.** The non-linear equations of the adsorption isotherms and kinetic models used to assess the adsorption process.

| Adsorption isotherm               | Equation                                                                          |
|-----------------------------------|-----------------------------------------------------------------------------------|
| Langmuir isotherm                 | $q_e = \frac{q_m \cdot K_L \cdot C_e}{1 + K_L \cdot C_e}$                         |
| Freundlich isotherm               | $q_e = K_F \cdot C_e^{1/n_F}$                                                     |
| Temkin isotherm                   | $q_e = \frac{R \cdot T}{b} \cdot \ln(K_T \cdot C_e)$                              |
| Sips isotherm                     | $q_e = \frac{Q_{sat} \cdot K_S \cdot C_e^n}{1 + K_S \cdot C_e^n}$                 |
| Redlich-Peterson isotherm         | $q_e = \frac{K_{RP} \cdot C_e}{1 + a_{RP} \cdot C_e^{\beta_{RP}}}$                |
| Kinetic model                     | Equation                                                                          |
| Pseudo-first-order kinetic model  | $q_t = q_e (1 - \exp^{-k_1 \cdot t})$                                             |
| Pseudo-second-order kinetic model | $q_t = \frac{k_2 \cdot t \cdot q_e^2}{1 + k_2 \cdot t \cdot q_e}$                 |
| Elovich kinetic model             | $q_t = \frac{1}{a} \ln(1 + a \cdot b \cdot t)$                                    |
| Avrami kinetic model              | $q_t = q_{AV} [1 - \exp(-k_{AV} \cdot t)^{n_{AV}}]$                               |
| General order kinetic model       | $q_t = q_n - \frac{q_n}{[k_n \cdot (q_n)^{n-1} \cdot t \cdot (n-1) + 1]^{1/1-n}}$ |

where:

-  $q_m$  and  $Q_{sat}$  are the maximum absorption capacities;  $K_L$ ,  $K_F$ ,  $K_T$ ,  $K_S$  and  $K_{RP}$  are the Langmuir, Freundlich, Temkin, Sips and Redlich-Peterson isotherms constants;  $1/n_F$  is an empirical constant indicating the intensity of adsorption;  $R$  is the universal gas constant;  $T$  is the absolute temperature;  $b$  is Temkin constant which related to the adsorption heat;  $n$  is Sips isotherm exponent;  $a_{RP}$  is Redlich-Peterson isotherm constant and  $\beta_{RP}$  is Redlich-Peterson exponent which can vary between 0 and 1.

-  $q_t$  is the dye amount adsorbed at time  $t$ ;  $k_1$ ,  $k_2$ ,  $k_n$  and  $k_{AV}$  are the rate constants of pseudo-first-order, pseudo-second-order, general order and Avrami kinetic models;  $q_e$ ,  $q_n$  and  $q_{AV}$  are the theoretical values for the adsorption capacity;  $a$  is the desorption constant of

Elovich model;  $b$  is the initial velocity;  $n$  is the general order exponent and  $n_{AV}$  is a fractional exponent.

**Table S2.** The calculation equations for error parameters  $R^2$ ,  $\chi^2$ , SSE and ARE.

| Function name                       | Equation                                                                                                     |
|-------------------------------------|--------------------------------------------------------------------------------------------------------------|
| Determination coefficient ( $R^2$ ) | $R^2 = 1 - \frac{\sum_{i=1}^n (y_{i,exp} - y_{i,mod})^2}{\sum_{i=1}^n (y_{i,exp} - \overline{y_{i,exp}})^2}$ |
| Sum of square error (SSE)           | $SSE = \sum_{i=1}^n (y_{i,exp} - y_{i,mod})^2$                                                               |
| Chi-square ( $\chi^2$ )             | $\chi^2 = \sum_{i=1}^n \frac{(y_{i,exp} - y_{i,mod})^2}{y_{i,mod}}$                                          |
| Average relative error (ARE)        | $ARE = \frac{100}{n} \sum_{i=1}^n \left  \frac{y_{i,exp} - y_{i,mod}}{y_{i,mod}} \right $                    |

where:  $y_{i,exp}$  is the experimental value;  $y_{i,mod}$  is the modeled value;  $\overline{y_{i,exp}}$  is the mean values and  $n$  is the total amount of information.

**Table S3.** The equations of specific thermodynamic parameters.

| Thermodynamic parameters          | Equation                                                 |
|-----------------------------------|----------------------------------------------------------|
| Standard Gibbs free energy change | $\Delta G^0 = -RT \ln K_L$                               |
| Standard enthalpy change          | $\ln K_L = \frac{\Delta S^0}{R} - \frac{\Delta H^0}{RT}$ |
| Standard entropy change           |                                                          |

where:  $R$  represents the universal gas constant;  $K_L$  represents the Langmuir constant,  $T$  represents the absolute temperature.

**Table S4.** The equation used to calculate the desorption efficiency

| Desorption efficiency equation      |
|-------------------------------------|
| $D(\%) = \frac{m_d}{m_a} \cdot 100$ |

where:  $m_d$  is the crystal violet amount liberated by the desorbing agent,  $m_a$  is the crystal violet amount adsorbed on the adsorbent material.

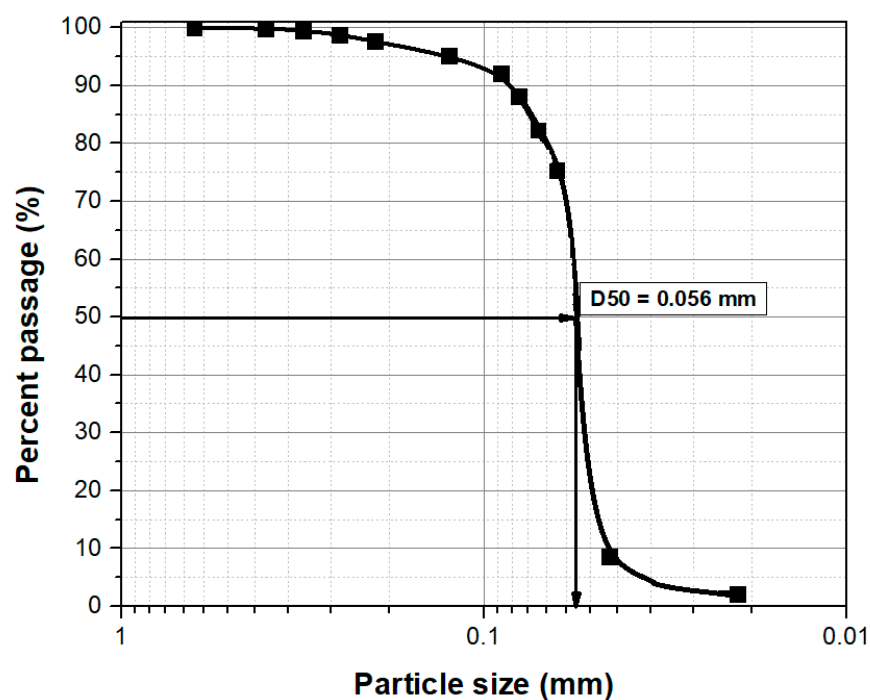

**Figure S1.** The particle size distribution of hart's-tongue fern (*Asplenium scolopendrium*) leaves powder

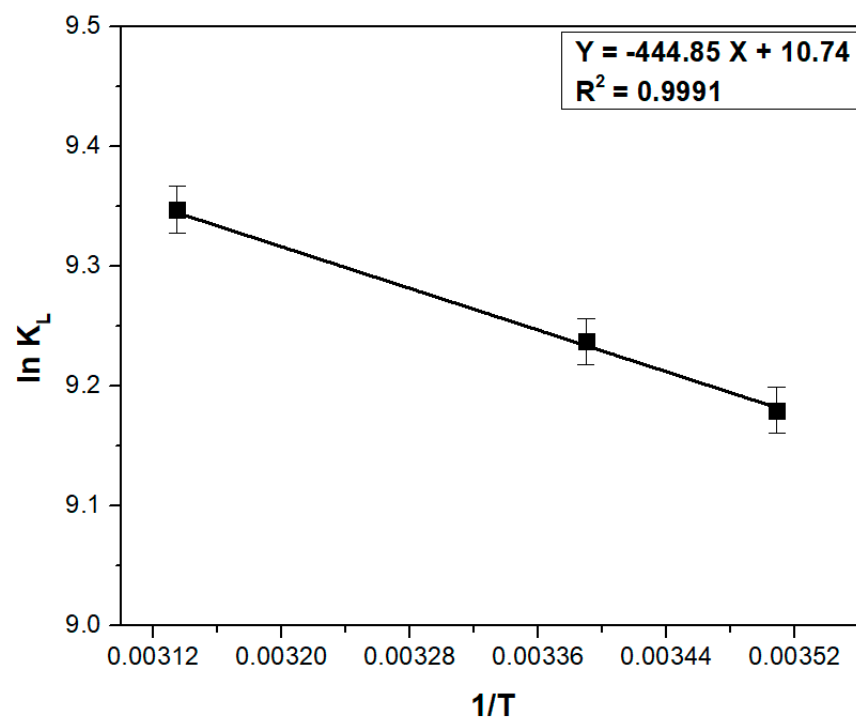

**Figure S2.** Plot of  $\ln K_L$  vs.  $1/T$  for the dye adsorption onto hart's-tongue fern (*Asplenium scolopendrium*) leaves powder
